# Supplementary material for: A near-infrared probe for the real-time detection of lysosomal pH in living cells under “wash free” conditions
Source: Royal Society of Chemistry journal article supplement (doi:10.1039/d2tb01441f), 2022-01-01
Supplement: d2tb01441f1.pdf [file d2tb01441f1.pdf]

## *Supporting information*

### **A near-infrared probe for real-time detection of lysosome pH value in living cells under “wash free” conditions**

Ziqiang Wang <sup>a</sup>, Tingting Pan <sup>b</sup>, Yanqing Tian <sup>c,\*</sup>, Jianxiang Liao <sup>b,\*</sup>

<sup>a</sup> *School of Medicine, Southern University of Science and Technology, No 1088  
Xueyuan Blvd, Xili, Nanshan District, Shenzhen, Guangdong, 518055, China*

<sup>b</sup> *Department of Pediatric Neurology, Shenzhen Children's Hospital, 7019 Yitian  
Road, Shenzhen, 518038, China*

<sup>c</sup> *Department of Materials Science and Engineering, Southern University of Science  
and Technology, No 1088 Xueyuan Blvd, Xili, Nanshan District, Shenzhen,  
Guangdong, 518055, China*

\* Corresponding authors.

*E-mail address: liaojianxiang@vip.sina.com (J. Liao), tianyq@sustech.edu.cn (Y.  
Tian).*

## **Table of Contents**

- 1. Synthesis and characterization**
- 2. Spectral characteristics of W1 molecules**
- 3. Spectral characteristics of W2 and W3 molecules**
- 4. Cytotoxicity evaluation of W1 molecules**
- 5. Images of W1 with different concentrations**
- 6. Co-location analysis of W3 molecules**
- 7. Dielectric constants of common solvents**

## 1. Synthesis and characterization

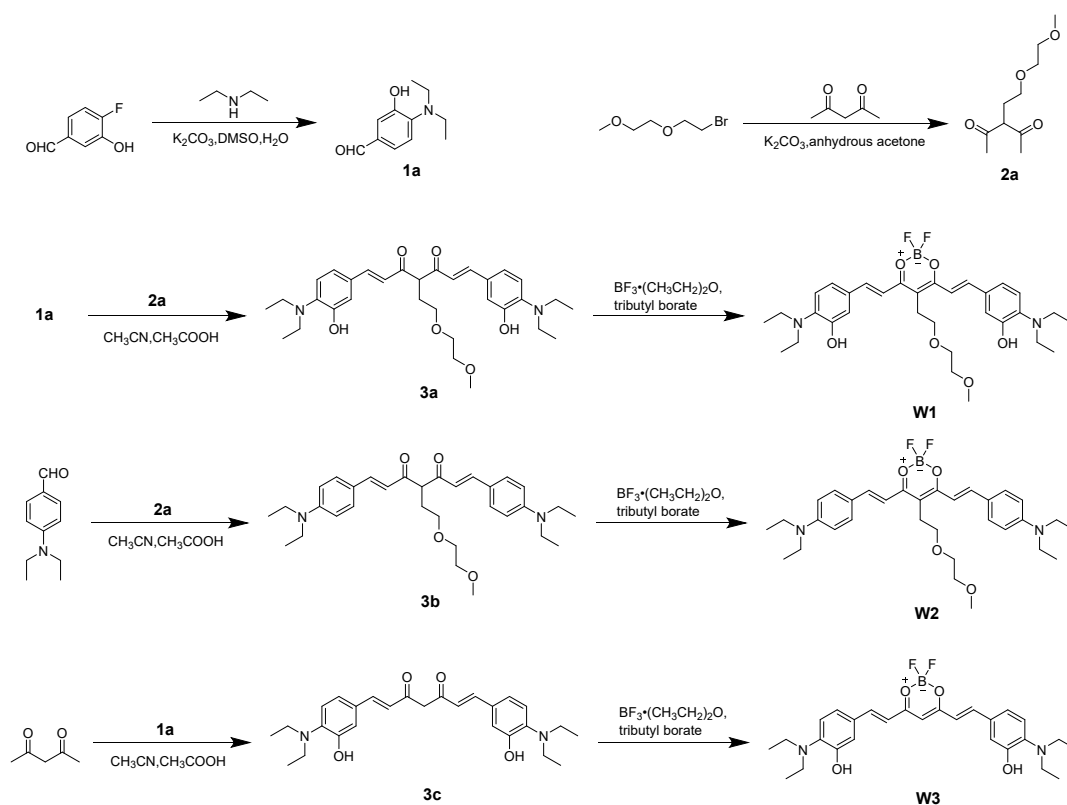

Scheme S1. Synthetic routes of W1, W2 and W3.

The synthesis of W1, W2 and W3 was given in detail in Scheme S1.

**Synthesis of 1a.** 4-Fluoro-3-hydroxybenzaldehyde (280 mg, 2 mmol) and diethylamine (3 mL, 2.2 mmol) were mixed in a flask with 10 mL of DMSO.  $K_2CO_3$  (430 mg, 3.1 mmol) and 3 mL of dd $H_2O$  were added. The mixture was refluxed at 180°C for 15 h. A crude product is obtained by evaporating the solvent. Product **1a** was further purified by silica gel chromatography (hexane/ethyl acetate). Yield is 25.4%.  $^1H$  NMR (400 MHz,  $CDCl_3$ )  $\delta$  (ppm) = 9.74 (s, H), 7.51 (d,  $J$  = 6.9 Hz, H), 7.15 (d,  $J$  = 14.8 Hz, H), 6.81 (d,  $J$  = 3.6 Hz, H), 3.42 (d,  $J$  = 4.1 Hz, 4H), 1.13 (t,  $J$  = 7.2 Hz, 6H).

**Synthesis of 2a.** 1-Bromo-2-(2-methoxyethoxy)ethane (800 mg, 4.4 mmol) was dissolved in acetone (8 mL), and then  $K_2CO_3$  (860 mg, 6.2 mmol), KI (catalyst, 10 mg,) and acetylacetone (473  $\mu$ L, 4.4 mmol) were added to the mixture. The mixture was stirred at 65°C for 20 h. After the reaction, it was poured in water, and then extracted

with ethyl acetate (3×15 mL). The organic layer was washed with saturated NaCl, and dried over Na<sub>2</sub>SO<sub>4</sub>. Compound **2a** was obtained after flash column chromatography (hexane/ethyl acetate) with a yield of 40.5%. <sup>1</sup>H NMR (400 MHz, CDCl<sub>3</sub>) δ (ppm) = 3.78 (t, *J*=4.9 Hz, 2H), 3.63 (t, *J*=7.9 Hz, 1H), 3.57-3.52 (m, 2H), 3.44-3.39 (m, 2H), 3.31 (s, 3H), 2.13 (s, 6H), 2.07-1.99 (m, 2H).

**Synthesis of 3a.** Compound **1a** (400 mg, 2 mmol) was dissolved in acetonitrile (3.0 mL), followed by the additions of acetic acid (6.7 μL, 0.1 mmol), tetrahydroisoquinoline (9.3 μL, 0.1 mmol), and **2a** (205 mg, 1 mmol). The resulted solution was stirred at r.t. for 4 h. **3a** was obtained after removing the solvent and subjected to flash column chromatography with methylene chloride. Yield: 42.8%. <sup>1</sup>H NMR (400 MHz, CDCl<sub>3</sub>) δ (ppm) = 7.63 (d, *J* = 15.7 Hz, 2H), 7.53 (d, *J* = 7.2 Hz, 2H), 7.16 (d, *J* = 15.3 Hz, 2H), 6.72 (d, *J* = 3.8 Hz, 2H), 6.58 (d, *J* = 3.6 Hz, 2H), 6.01 (s, 1H), 3.71 (t, *J* = 10.1, 5.6 Hz, 2H), 3.52-3.49 (m, 2H), 3.42-3.39 (m, 2H), 3.36-3.32 (m, 8H), 3.29 (s, 3H), 2.63 (t, *J* = 6.5 Hz, 2H), 1.13(t, *J* = 7.1 Hz, 12H). <sup>13</sup>C NMR (101 MHz, DMSO-*d*<sub>6</sub>) δ (ppm) = 150.79 (2C), 146.18 (2C), 140.43 (2C), 131.41 (2C), 130.99 (2C), 121.96 (2C), 121.08, 120.16, 119.69, 116.45 (2C), 111.98, 111.57, 71.71, 69.91, 68.34, 59.01, 46.06 (4C), 26.96, 12.41 (4C). HRMS: Calcd. [M-H]<sup>+</sup>: 551.3199; found value [M-H]<sup>+</sup>: 551.3181.

**Synthesis of W1.** BF<sub>3</sub>·Et<sub>2</sub>O (3 mL) was slowly added to **3a** (1.1 g, 2 mmol) in tributyl borate (768 μL, 6.10 mmol) under the protection of nitrogen. The reaction mixture was then stirred at r.t. for 4 h, and the **W1** was obtained after removing the solvent and purified by silica gel chromatography (hexane/ethyl acetate). Yield is 95.4%. <sup>1</sup>H NMR (400 MHz, CDCl<sub>3</sub>) δ (ppm) = 7.83 (d, *J* = 15.7 Hz, 2H), 7.52 (d, *J* = 7.8 Hz, 2H), 7.22 (d, *J* = 15.8 Hz, 2H), 6.89 (d, *J* = 3.7 Hz, 2H), 6.75 (d, *J* = 3.8 Hz, 2H), 3.63 (t, *J* = 3.2 Hz, 2H), 3.53-3.51 (m, 2H), 3.43-3.40 (m, 2H), 3.38-3.34 (m, 8H), 3.31 (s, 3H), 2.64 (t, *J* = 6.8 Hz, 2H), 1.14(t, *J* = 7.3 Hz, 12H). <sup>13</sup>C NMR (101 MHz, DMSO-*d*<sub>6</sub>) δ (ppm) = 151.19 (2C), 147.65 (2C), 140.16 (2C), 132.59 (2C), 130.25 (2C), 122.84 (2C), 120.88, 120.26, 119.76, 116.40 (2C), 112.34, 111.77, 71.81, 69.94, 68.74, 59.13, 46.17

(4C), 26.89, 12.35 (4C). HRMS: Calcd.  $[M-H]^+$ : 599.3492; found value  $[M-H]^+$ : 599.3529.

**Synthesis of 3b.** 4-(Diethylamino)benzaldehyde (0.71 g, 2 mmol) was dissolved in acetonitrile (3.0 mL), followed by the additions of acetic acid (6.7  $\mu$ L, 0.1mmol), tetrahydroisoquinoline (9.3  $\mu$ L, 0.1 mmol), and **2a** (205 mg, 1 mmol). The resulting solution was stirred at r.t. for 4 h. **3b** was obtained after removing the solvent and subjecting to flash column chromatography with methylene chloride. Yield: 81.4%.  $^1\text{H}$  NMR (400 MHz,  $\text{CDCl}_3$ )  $\delta$  (ppm) = 7.88 (d,  $J$  = 15.6 Hz, 2H), 7.59 (d,  $J$  = 4.9 Hz, 4H), 7.23 (d,  $J$  = 4.2 Hz, 2H), 6.81 (d,  $J$  = 11.7 Hz, 4H), 5.98 (s, 1H), 3.74 (t,  $J$  = 3.6 Hz, 2H), 3.54-3.51 (m, 2H), 3.44-3.40 (m, 2H), 3.37-3.34 (m, 8H), 3.31 (s, 3H), 2.65 (t,  $J$  = 6.2 Hz, 2H), 1.12(t,  $J$  = 6.9 Hz, 12H).  $^{13}\text{C}$  NMR (101 MHz,  $\text{DMSO-}d_6$ )  $\delta$  (ppm) = 145.95 (2C), 142.03 (2C), 134.33 (2C), 130.99 (4C), 126.08 (2C), 120.97, 120.19 (2C), 111.02 (4C), 72.17, 69.43, 68.83, 58.92, 46.18 (4C), 26.71, 12.60 (4C). HRMS: Calcd.  $[M+H]^+$ : 521.3301; found value  $[M+H]^+$ : 521.3324.

**Synthesis of W2.**  $\text{BF}_3 \cdot \text{Et}_2\text{O}$  (3 mL) was slowly added to **3b** (1.04 g, 2 mmol) in tributyl borate (768  $\mu$ L, 6.10 mmol) under the protection of nitrogen. The reaction mixture was then stirred at r.t. for 4 h, and the **W2** was obtained after removing the solvent with a yield of 88.7%.  $^1\text{H}$  NMR (400 MHz,  $\text{CDCl}_3$ )  $\delta$  (ppm) = 8.15 (d,  $J$  = 16.2 Hz, 2H), 7.63 (d,  $J$  = 4.3 Hz, 4H), 7.45 (d,  $J$  = 4.8 Hz, 2H), 6.77 (d,  $J$  = 11.7 Hz, 4H), 3.72 (t,  $J$  = 3.6 Hz, 2H), 3.59 (t,  $J$  = 3.5 Hz, 2H), 3.48 (t,  $J$  = 4.6 Hz, 2H), 3.42 – 3.39 (m, 8H), 3.35 (s, 3H), 2.74 (t,  $J$  = 6.2 Hz, 2H), 1.14(t,  $J$  = 6.9 Hz, 12H).  $^{13}\text{C}$  NMR (101 MHz,  $\text{DMSO-}d_6$ )  $\delta$  (ppm) = 145.75 (2C), 141.17 (2C), 133.12 (2C), 132.59 (4C), 126.37 (2C), 121.51, 120.12 (2C), 110.22 (4C), 72.19, 69.50, 68.34, 59.22, 46.26 (4C), 26.75, 12.42 (4C). HRMS: Calcd.  $[M+H]^+$ : 569.3284; found value  $[M+H]^+$ : 569.3299.

**Synthesis of 3c.** **1a** (1.6 g, 8 mmol) was dissolved in acetonitrile (3.0 mL), followed by the additions of acetic acid (6.7  $\mu$ L, 0.1mmol), tetrahydroisoquinoline (9.3  $\mu$ L, 0.1 mmol), and acetylacetone (460  $\mu$ L, 4.0 mmol), the resulting solution was stirred at r.t.

for 8 h. **3c** was obtained after removing the solvent and subjecting to flash column chromatography with methylene chloride. Yield: 75.1%. <sup>1</sup>H NMR (400 MHz, CDCl<sub>3</sub>) δ (ppm) = 7.78 (d, *J* = 16.2 Hz, 2H), 7.65 (d, *J* = 7.8 Hz, 2H), 7.27 (d, *J* = 12.1 Hz, 2H), 6.88 (d, *J* = 7.1 Hz, 2H), 6.78 (d, *J* = 15.5 Hz, 2H), 6.16 (m, 2H), 3.83-3.77 (m, 8H), 1.13(t, *J* = 7.1 Hz, 12H). <sup>13</sup>C NMR (101 MHz, DMSO-*d*<sub>6</sub>) δ (ppm) = 182.23 (2C), 152.76 (2C), 139.77 (2C), 135.07 (2C), 130.41 (2C), 124.15, 120.12 (2C), 116.49 (2C), 113.27 (2C), 104.36, 46.12 (4C), 12.37 (4C). HRMS: Calcd. [M-H]<sup>+</sup>: 451.2519; found value [M-H]<sup>+</sup>: 451.2534.

**Synthesis of W3.** BF<sub>3</sub>·Et<sub>2</sub>O (3 mL) was slowly added to **4a** (0.89 g, 2 mmol) in tributyl borate (768 μL, 6.10 mmol) under the protection of nitrogen. The reaction mixture was then stirred at r.t. for 4 h. **W3** was obtained after removing the solvent. Yield: 87.6%. <sup>1</sup>H NMR (400 MHz, CDCl<sub>3</sub>) δ (ppm) = 7.95 (d, *J* = 16.4 Hz, 2H), 7.66 (d, *J* = 8.3 Hz, 2H), 7.38 (d, *J* = 13.4 Hz, 2H), 6.92 (d, *J* = 7.2 Hz, 2H), 6.81 (d, *J* = 15.9 Hz, 2H), 6.34 (s, 1H), 3.90-3.84 (m, 8H), 1.15(t, *J* = 7.2 Hz, 12H). <sup>13</sup>C NMR (101 MHz, DMSO-*d*<sub>6</sub>) δ (ppm) = 181.19 (2C), 151.56 (2C), 140.25 (2C), 135.96 (2C), 129.37 (2C), 123.48, 119.91 (2C), 116.86 (2C), 112.92 (2C), 103.73, 46.28 (4C), 12.31 (4C). HRMS: Calcd. [M-H]<sup>+</sup>: 497.2531; found value [M-H]<sup>+</sup>: 497.2559.

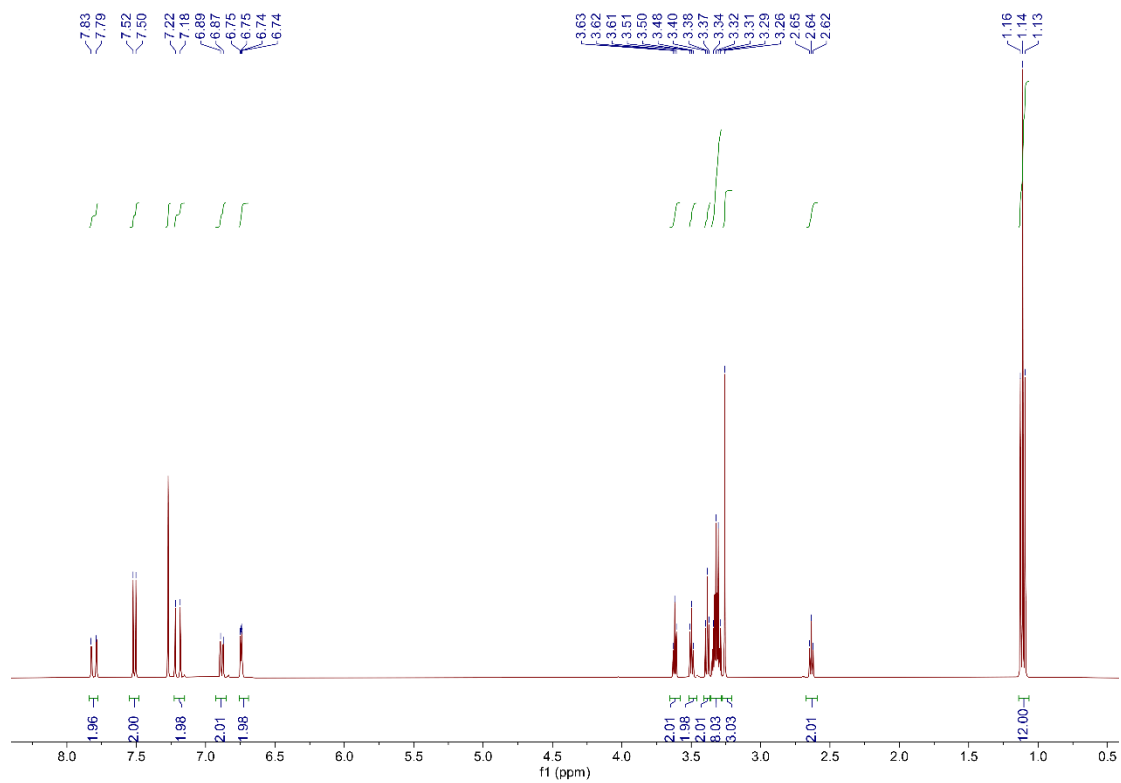

Fig. S1.  $^1\text{H}$  NMR of W1.

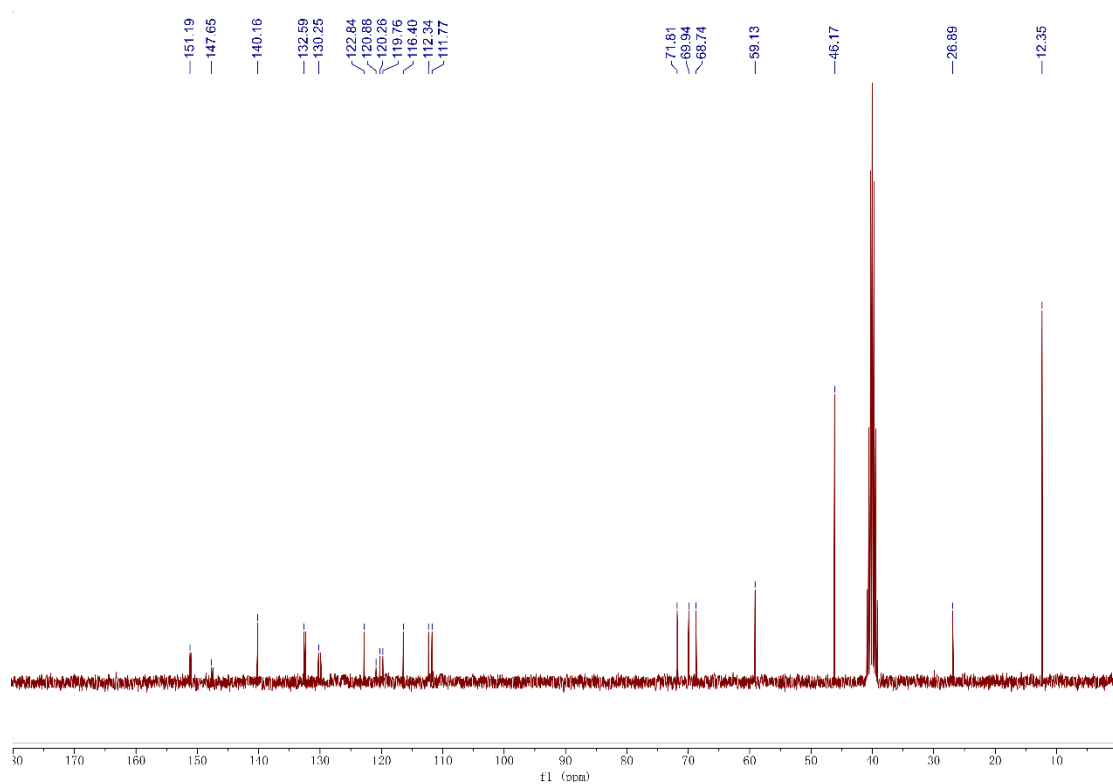

Fig. S2.  $^{13}\text{C}$  NMR of W1.

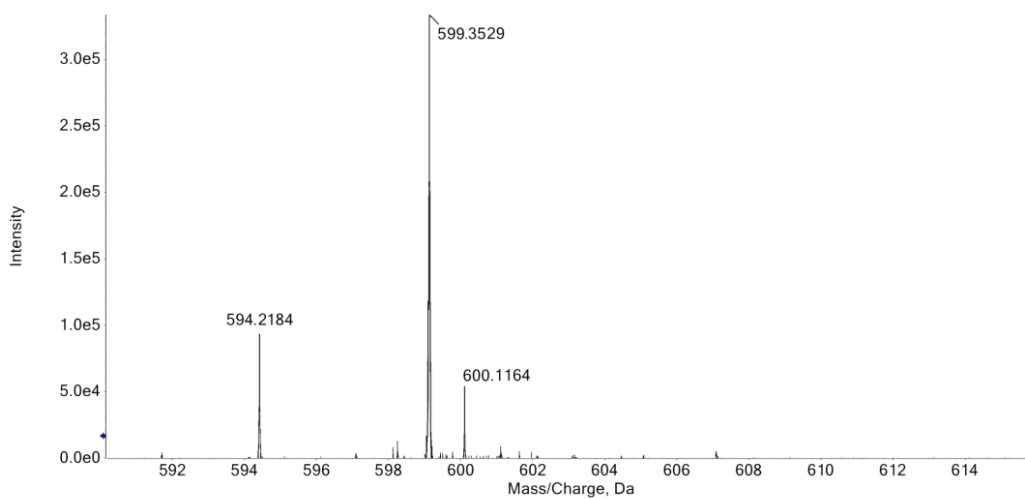

**Fig. S3. HRMS of W1.**

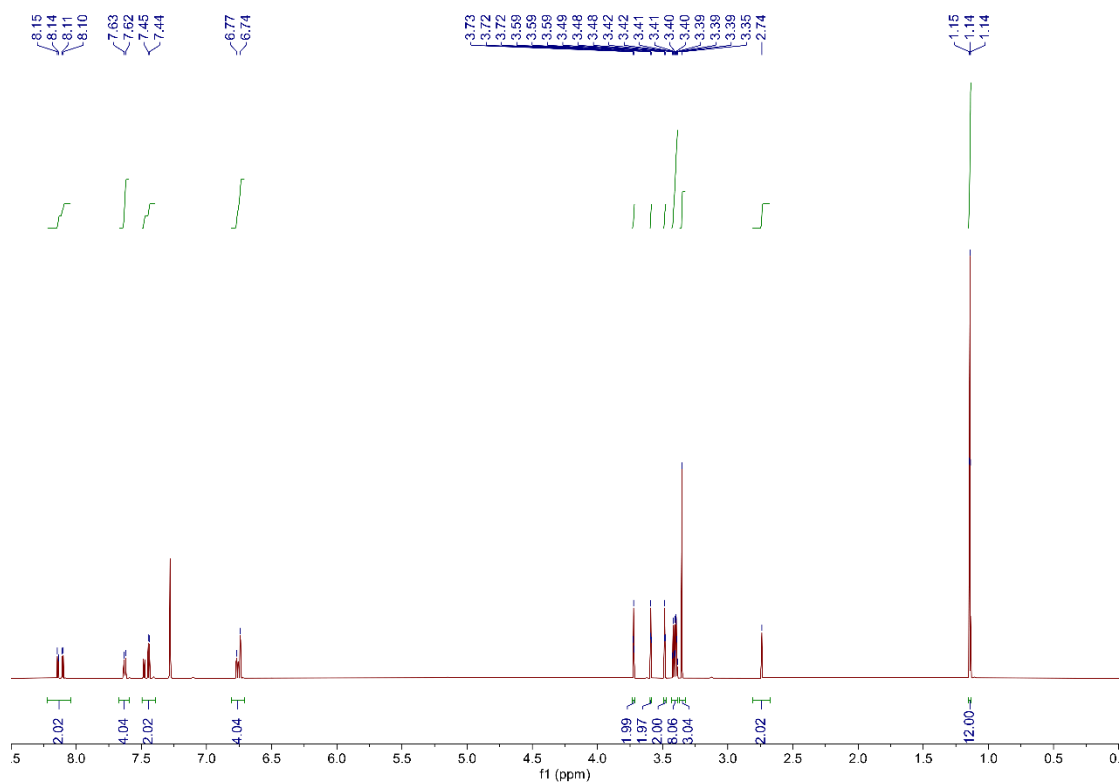

**Fig. S4. <sup>1</sup>H NMR of W2.**



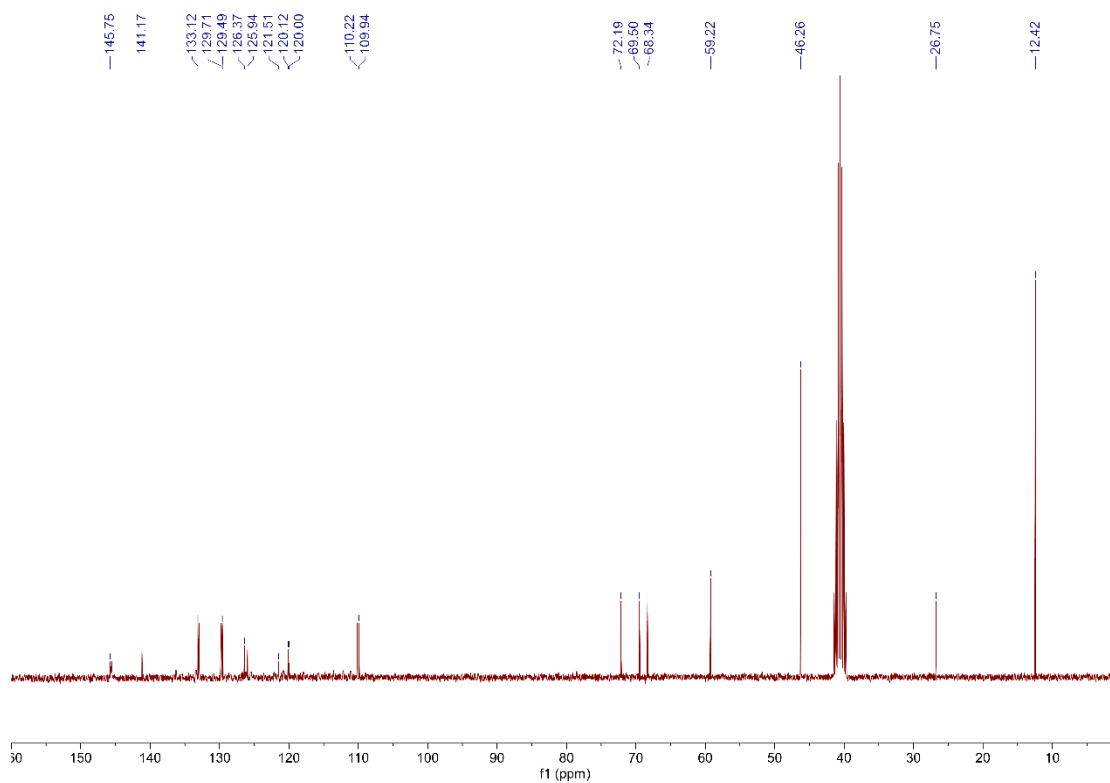

**Fig. S5.** <sup>13</sup>C NMR of W2.

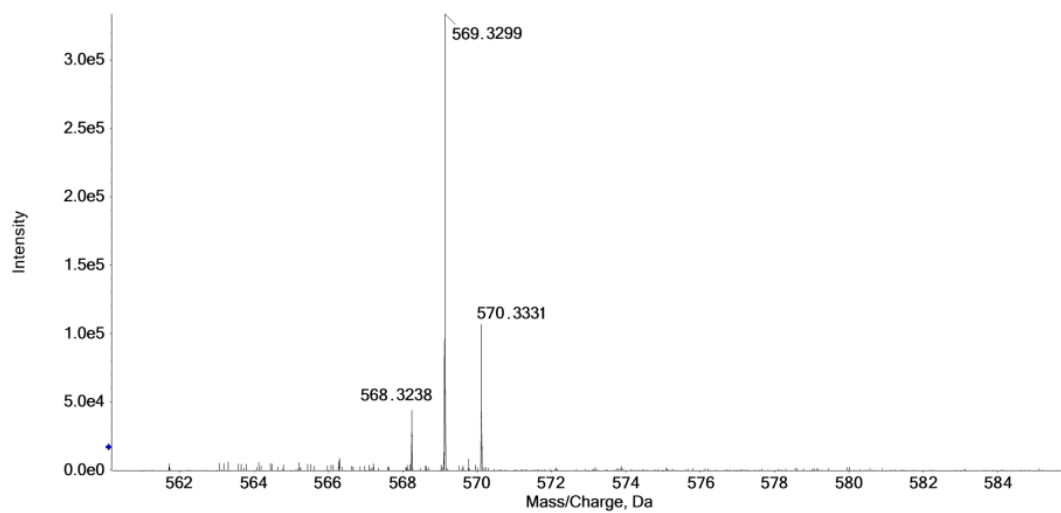

**Fig. S6.** HRMS of W2.

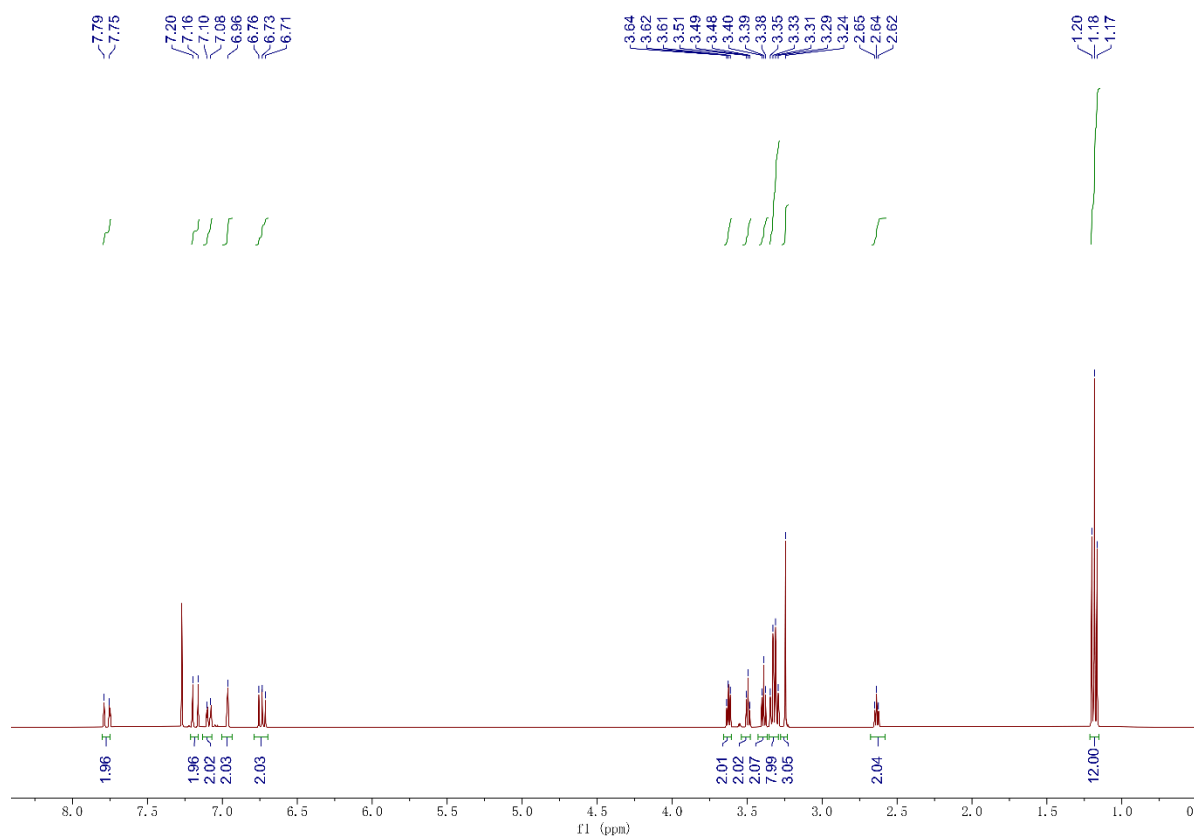

Fig. S7.  $^1\text{H}$  NMR of W3.

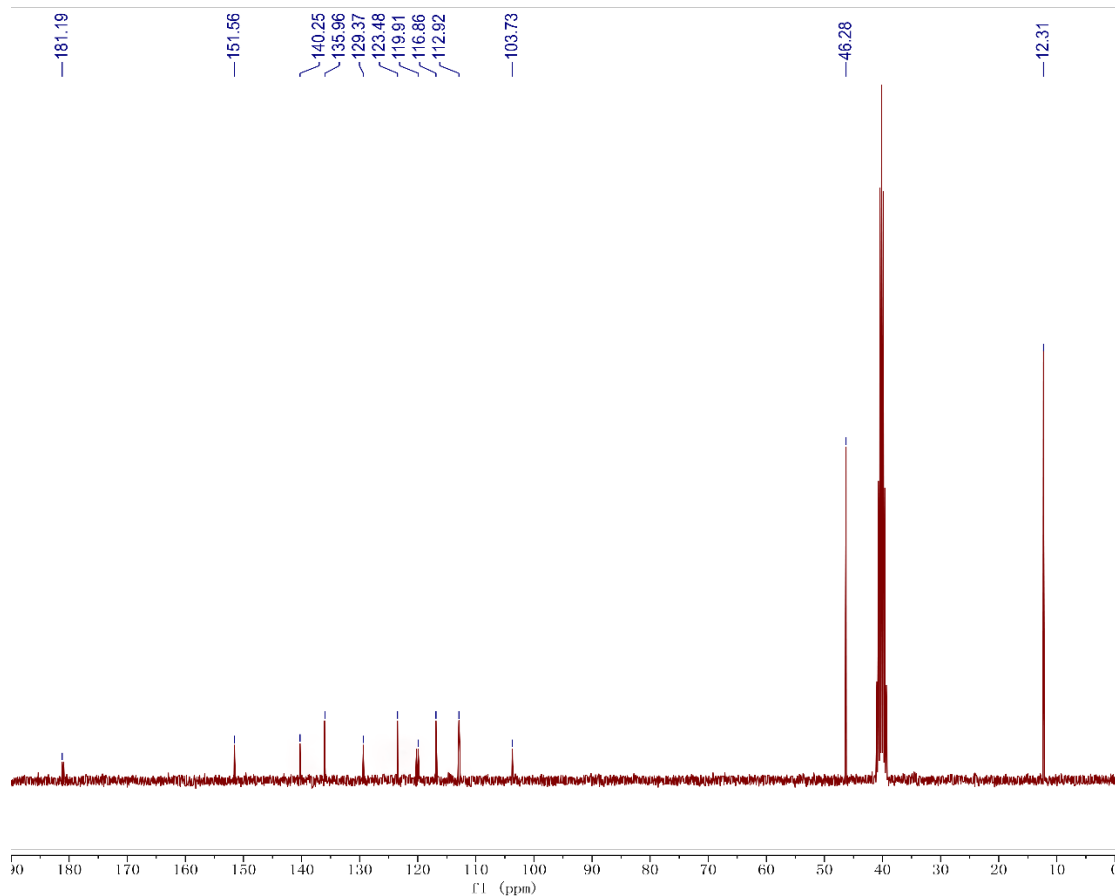

**Fig. S8.**  $^{13}\text{C}$  NMR of **W3**.

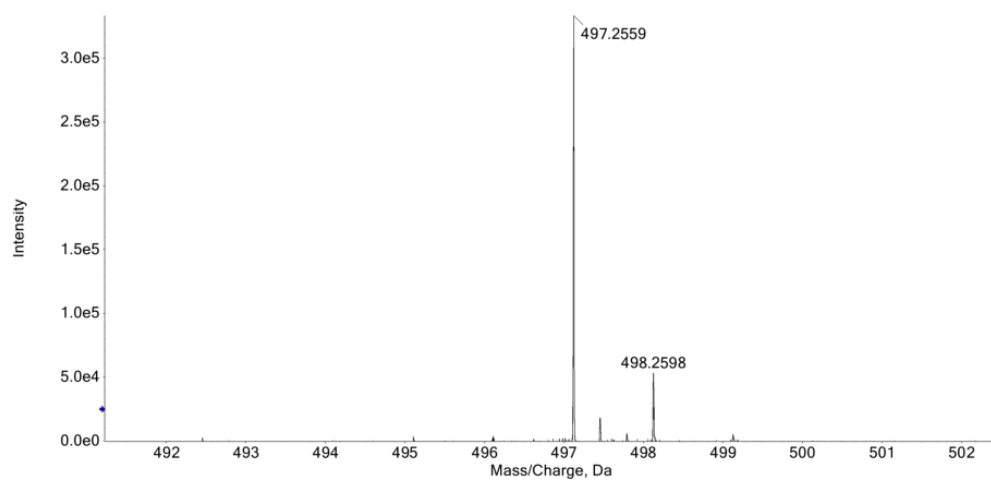

**Fig. S9.** HRMS of **W3**.

## 2. Spectral characteristics of W1 molecules

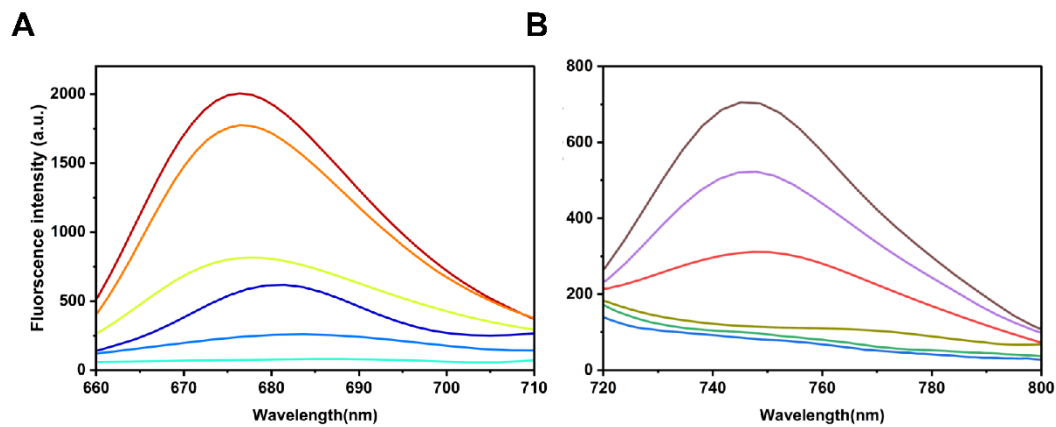

**Fig. S10.** (A) Fluorescence spectra of **W1** (5 μM) at different pH (4.0-9.0) in the B-R buffer/EtOH (1/1, v/v) solution (λ<sub>ex</sub> = 580 nm). (B) Fluorescence spectra of **W1** (5 μM) at different pH (4.0-9.0) in the B-R buffer/EtOH (1/1, v/v) solution (λ<sub>ex</sub> = 660 nm).

### 3. Spectral characteristics of W2 and W3 molecules

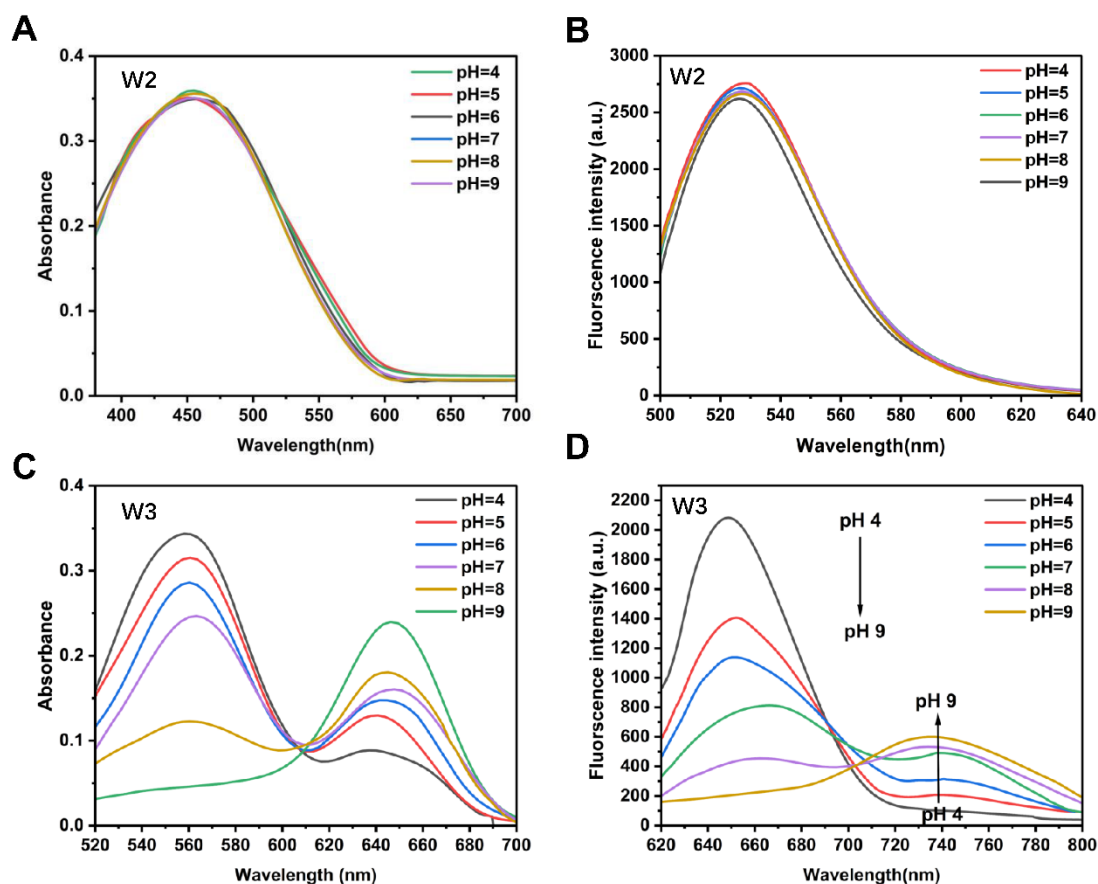

**Fig. S11.** (A) UV-vis spectra of **W2** (5 μM) at different pH (4.0-9.0) in the B-R buffer/EtOH (1/1, v/v) solution. (B) Fluorescence spectra of **W2** (5 μM) at different pH (4.0-9.0) in the B-R buffer/EtOH (1/1, v/v) solution ( $\lambda_{\text{ex}} = 450$  nm). Thumbnail is the color change of **W2** in different pH solutions. (C) UV-vis spectra of **W3** (5 μM) at different pH (4.0-9.0) in the B-R buffer/EtOH (1/1, v/v) solution. (D) Fluorescence spectra of **W3** (5 μM) at different pH (4.0-9.0) in the B-R buffer/EtOH (1/1, v/v) solution ( $\lambda_{\text{ex}} = 610$  nm).

#### 4. Cytotoxicity evaluation of W1

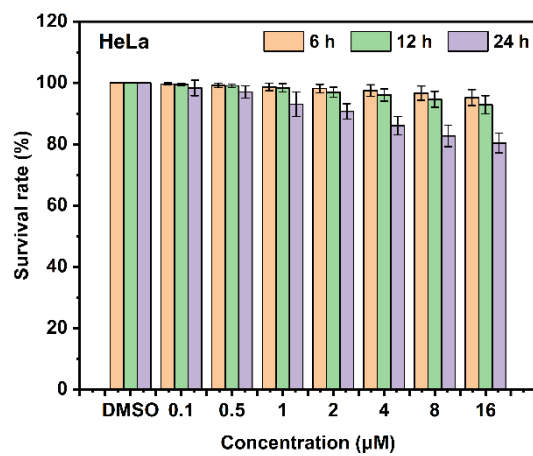

**Fig. S12.** W1 was incubated with HeLa cells for 6 hours, 12 hours and 24 hours respectively, and the cytotoxicity was evaluated by MTT assay.

## 5. Images of W1 with different concentrations

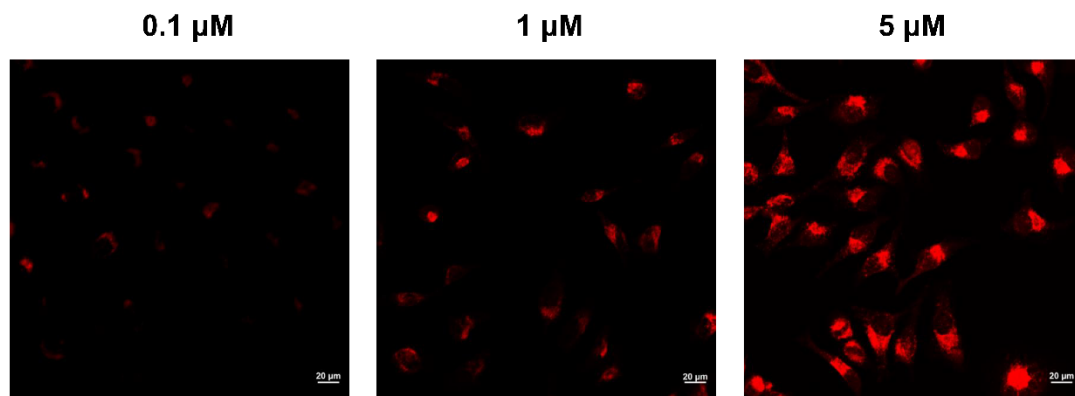

**Fig. S13.** Images of HeLa cells at different concentrations (0.1, 1, 5  $\mu\text{M}$ ) of **W1**.  $\lambda_{\text{ex}} = 594$  nm, emission was collected 660 to 720 nm.

## 6. Co-location analysis of W3

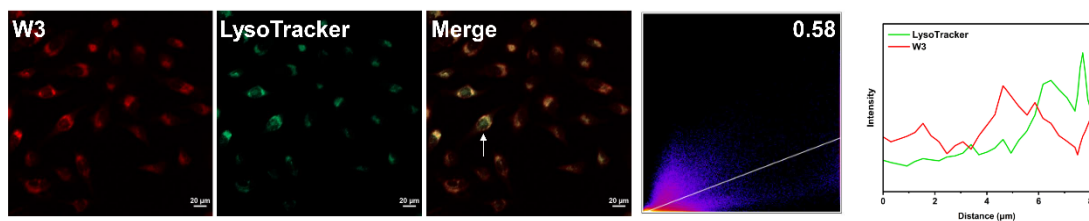

**Fig. S14.** Intracellular localization of **W3** was performed in HeLa cells. Cells were incubated with **W3** ( $\lambda_{\text{ex}} = 594$  nm, collected 660-720 nm) and Lyso Tracker Green ( $\lambda_{\text{ex}} = 488$  nm, collected 490-530 nm) for 40 min, respectively. The fourth column represents the intensity correlation plot of dyes and probes. The fifth column represents cross-sectional analysis along the white line in the insets. Scale bars: 20  $\mu\text{m}$ .



## 7. Dielectric constants of common solvents

| Solvents             | EtOH | MeOH | CH <sub>3</sub> CN | DMSO | H <sub>2</sub> O |
|----------------------|------|------|--------------------|------|------------------|
| Dielectric constants | 24.3 | 33.6 | 37.5               | 47.2 | 80.4             |

**Table S1.** Dielectric constants of common solvents.<sup>1</sup>

### References:

1. W. M. Latimer, *Chemical Reviews*, 1949, **44**, 59-67.
